# Supplementary material
Source: Springer Nature journal article supplement (https://www.springermedizin.de/resource/supplementary/12959_2013_182_MOESM6_ESM.pdf/9569220)

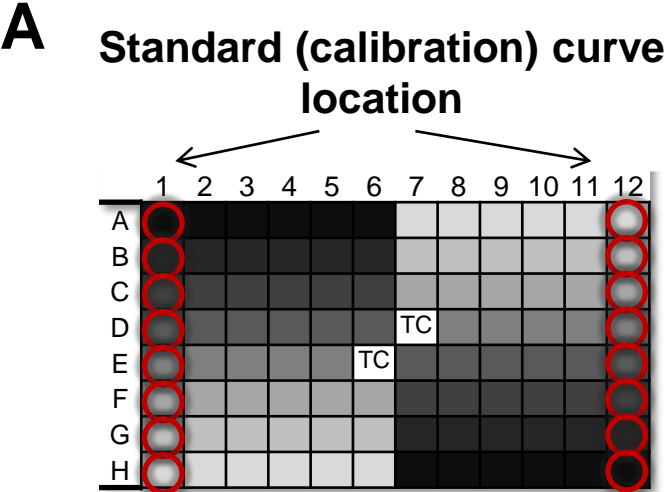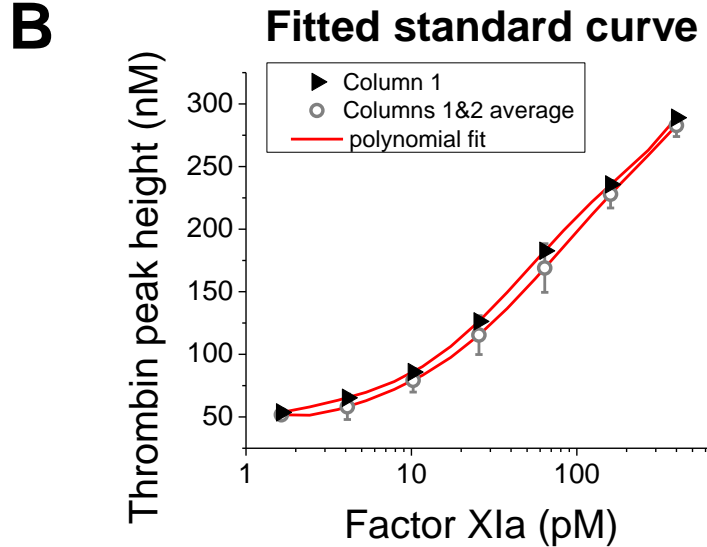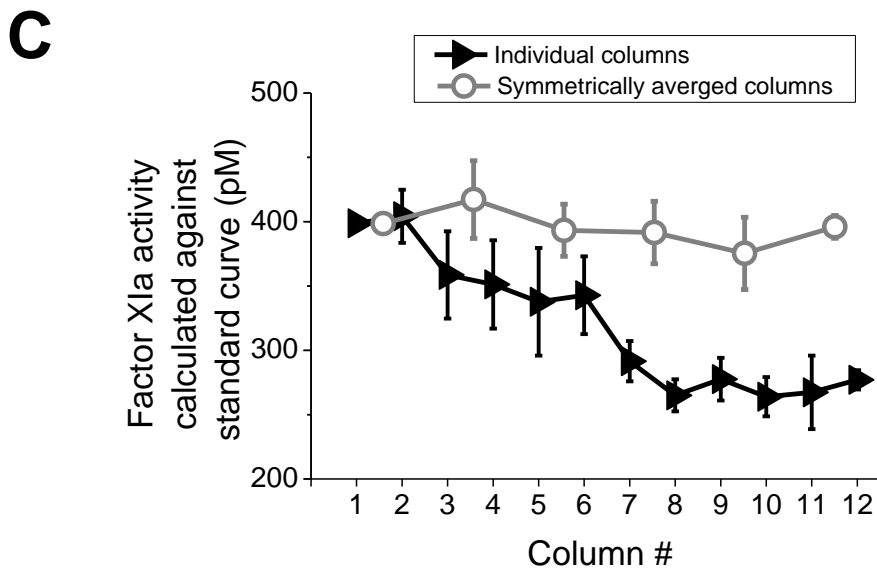

Supplement: MOESM6 [file 9569220]
